# Supplementary material for: An Expanded Genetic Code Enables Trimethylamine Metabolism in Human Gut Bacteria
Source: PubMed Central journal article supplement (PMC7593587; doi:10.1128/msystems.00413-20), 2020-10-27
Supplement: mSystems.00413-20-sf001.pdf [file mSystems.00413-20-sf001.pdf]

**A****Bilophila sp. 4\_1\_30**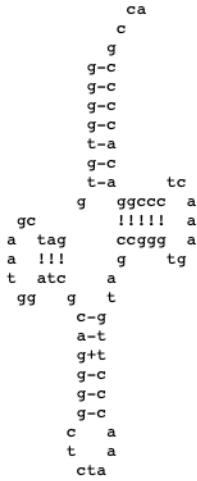

tRNA-Pyl(cta)  
72 bases, %GC = 62.5  
Sequence [437,508]

Primary sequence for tRNA-Pyl(cta)  
1 . 10 . 20 . 30 . 40 . 50  
ggggtgtggatcgaatggatcgagggtctaaaccctgtagccgggt  
gaaactcccggacaccgccca

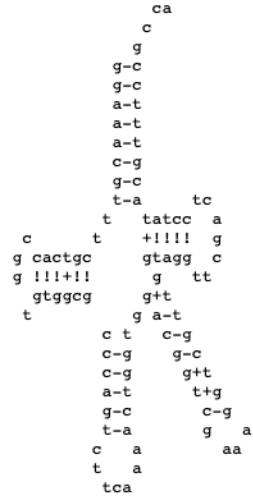

tRNA-SeC(tca)  
94 bases, %GC = 55.3  
Sequence c[862704,862797]

Primary sequence for tRNA-SeC(tca)  
1 . 10 . 20 . 30 . 40 . 50  
ggaacgtttcgtcacgggtgtggcggccagtcctcaaaactggtggacg  
gtcgaaaggtcgttggtaggttcgactcctatacgtttccgccca

**B****Bilophila wadsworthia 3\_1\_6**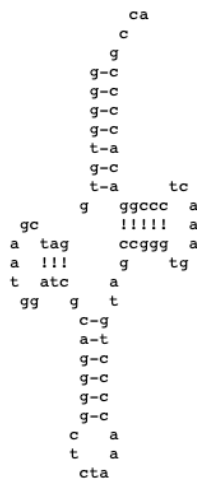

tRNA-Pyl(cta)  
72 bases, %GC = 63.9  
Sequence [735263,735334]

Primary sequence for tRNA-Pyl(cta)  
1 . 10 . 20 . 30 . 40 . 50  
ggggtgtggatcgaatggatcgagggtctaaaccctgtagccgggt  
gaaactcccggacaccgccca

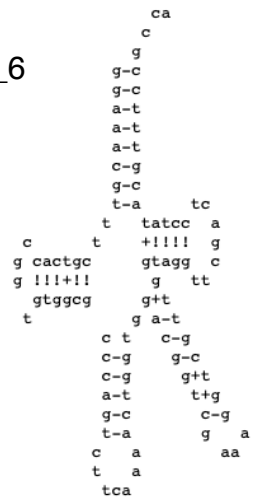

tRNA-SeC(tca)  
94 bases, %GC = 55.3  
Sequence c[70717,70810]

Primary sequence for tRNA-SeC(tca)  
1 . 10 . 20 . 30 . 40 . 50  
ggaacgtttcgtcacgggtgtggcggccagtcctcaaaactggtggacg  
gtcgaaaggtcgttggtaggttcgactcctatacgtttccgccca
