# Supplementary material for: An Expanded Genetic Code Enables Trimethylamine Metabolism in Human Gut Bacteria
Source: PubMed Central journal article supplement (PMC7593587; doi:10.1128/msystems.00413-20), 2020-10-27

Identity

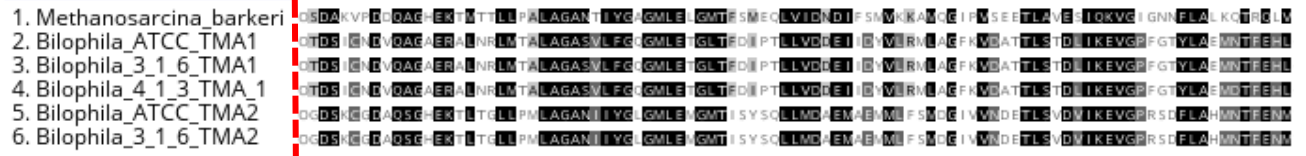

Supplement: mSystems.00413-20-sf002.pdf [file mSystems.00413-20-sf002.pdf]
