# Supplementary material for: An Expanded Genetic Code Enables Trimethylamine Metabolism in Human Gut Bacteria
Source: PubMed Central journal article supplement (PMC7593587; doi:10.1128/msystems.00413-20), 2020-10-27
Supplement: mSystems.00413-20-st001.pdf [file mSystems.00413-20-st001.pdf]

| <b>BIOPROJECT</b> | <b>DATA TYPE</b>                                 | <b>PUBLICATION / PROJECT</b>                                                                                            | <b>REF</b> |
|-------------------|--------------------------------------------------|-------------------------------------------------------------------------------------------------------------------------|------------|
| PRJNA354235       | Metatranscriptomic,<br>Human fecal               | <b>Nature Microbiology 2018</b><br>Metatranscriptome of human faecal microbial communities in a cohort of adult men     | 35         |
| PRJNA445875       | Metatranscriptomic,<br>mouse cecal               | <b>Nature Communications 2018</b> Bilophila wadsworthia aggravates high fat diet induced metabolic dysfunctions in mice | 36         |
| PRJNA202303       | Metagenomic,<br>human fecal                      | <b>Nature Letters 2014</b> Diet rapidly and reproducibly alters the human gut microbiome                                | 37         |
| PRJEB21528        | Metagenomic,<br>human fecal                      | <b>Nature Communication 2017</b> The gut microbiome in atherosclerotic cardiovascular disease                           | 29         |
| PRJNA41961        | Genomic, fecal<br>Bilophila sp.<br>4_1_30        | <b>Science 2010</b> A catalog of reference genomes from the human microbiome (HMP reference genome)                     | 39         |
| PRJNA41963        | Genomic, fecal<br>Bilophila_<br>3_1_6_V2         | <b>Science 2010</b> A catalog of reference genomes from the human microbiome (HMP reference genome)                     | 39         |
| PRJNA223063       | Genomic, abscess<br>B. wadsworthia<br>ATCC 49260 | <b>Nucleic Acids Res 2014</b> RefSeq microbial genomes database: new representation and annotation strategy             | 40         |
