# Supplementary material for: An Expanded Genetic Code Enables Trimethylamine Metabolism in Human Gut Bacteria
Source: PubMed Central journal article supplement (PMC7593587; doi:10.1128/msystems.00413-20), 2020-10-27
Supplement: mSystems.00413-20-st002.pdf [file mSystems.00413-20-st002.pdf]

| <b>ORGANISM ID</b>           | <b>PYL- TMA METHYLTRANSFERASE AMINO ACID SEQUENCE WITH PYRROLYSINE HIGHLIGHTED</b>                                                                                                                                                                                                                                                                                                                                                                                                                                                                                                                                           |
|------------------------------|------------------------------------------------------------------------------------------------------------------------------------------------------------------------------------------------------------------------------------------------------------------------------------------------------------------------------------------------------------------------------------------------------------------------------------------------------------------------------------------------------------------------------------------------------------------------------------------------------------------------------|
| <i>Bilophila_ sp_4_1_30,</i> | <p>MKRWAHSSLMGGVGVGLNFLREKDCEKIHEASLEVLHDRGAYFDSETAREVLRDHGCWED<br/> ADGCTHFPRTLVEALEAVPAEFVHRGRTPDDDIHMAQDQVYASNFGEGIFTHDLETGER<br/> RSTVKQDAVDILRVVDSLNDNIHIYNRAIGPQDVPSESASMHNAEVAFICYTSKPMHLVSGS<br/> PFQTKMIKMAEIAAGGKEELKRRPRTAFNHTTISPLRISHEACENAIIVAEAGLPNHIL<br/> VMVQQGATSPISYAGSVAVHNADFLAFNTLMQCVNRGNPTLYGASACVMDMCKGLSLVAA<br/> PEVFLVNAAMARMSKYNNIPSYIAGG<b>O</b>TDSICNDVQAGAERLNRLMTALAGASVLFQGG<br/> MLETGLTFDIPTLLVDDEIIDYVLRMLAGFKVDATTLSTDLIKEVGPFGTYLAEMDTFEH<br/> LGDLSYTNLMNRRNYDMWAASGKPDLYGQARERAKEILATHKQKNPLSPEQVKAIRDVLV<br/> DAEGELGVADFWKGKEEKRFIDNDLY</p> <p><b>(Pyl at AA 327 of 506)</b></p> |
| <i>Bilophila_ 3_1_6_V2,</i>  | <p>MKRWAHSSLMGGVGVGLNFLREKDCEKIHEASLEVLHDRGAYFDSETAREVLRDHGCWED<br/> ADGCTHFPRTLVEALEAVPAEFVHRGRTPDDDIHMAQDQVYASNFGEGIFTHDLETGER<br/> RSTVKQDAVDILRVVDSLNDNIHIYNRAIGPQDVPSESASMHNAEVAFICYTSKPMHLVSGS<br/> PFQTKMIKMAEIAAGGKEELKRRPRTAFNHTTISPLRISHEACENAMIVAEAGLPNHIL<br/> VMVQQGATSPISYAGSVAVHNADFLAFNTLLQCVNRGNPTLYGASACVMDMCKGLSLVAA<br/> PEVFLVNAAMARMSKYNNIPSYIAGG<b>O</b>TDSICNDVQAGAERLNRLMTALAGASVLFQGG<br/> MLETGLTFDIPTLLVDDEIIDYVLRMLAGFKVDATTLSTDLIKEVGPFGTYLAEMNTFEH<br/> LGDLSYTNLMNRRNYDMWAASGKPDLYGQARERAKEILATHKQKTPLSPEQVKAIRDVLV<br/> DAEGELGVADFWKGKEEKRFIDNDLY</p> <p><b>(Pyl at AA 327 of 506)</b></p> |
| <i>Bilophila_ 3_1_6_V2,</i>  | <p>MAQRWKKAGSLTTGGMSLVNFTQDEMDAIHRATLEVLEHTGVLIGSPEARALLVEAGASV<br/> IDEDIVRFPQWMVADAVSCAPETLLLAGRTPD RDVVDSTRVMFTNFGEAVYLIDPDTGE<br/> VRNTTKKDVEKLTRVVDALDVIPVCERMAGA QDYPEQVAELHNYEALLMNTTKHVFTGGG<br/> NGKLTQYMIDMAKAAVGEENFEERCVPVTFNTCPISPLKLTADVCEVIMTAARNGATVNVL<br/> SMGMAGGSTPVNLAGALVVHNCEALAGLVLAQTTRRGAKFIYGSSTAMDRLRYGAAVVG<br/> PELAVLNAGVAAMARYYKLPWAAGG<b>O</b>GDSKCGDAQSGHEKTLTGLLPMLAGANIYGLG<br/> MLEMGMTISYSQLLMDAEMAEMMLFSMDGIVVNDLTVSVDVIKEVGPVRSDFLAHMNTFEN<br/> MYIQSKPKLIDRLTRDRWNEAGHLDMESRALIAAKELLATWEPEPLPEEACARVRAVLNA<br/> AERDYGVPESLE</p> <p><b>(Pyl at AA 327 of 493)</b></p>              |

| ORGANISM ID                                                                                             | PYL- TMA METHYLTRANSFERASE AMINO ACID SEQUENCE WITH PYRROLYSINE HIGHLIGHTED                                                                                                                                                                                                                                                                                                                                                                                                                                                                                                                                                     |
|---------------------------------------------------------------------------------------------------------|---------------------------------------------------------------------------------------------------------------------------------------------------------------------------------------------------------------------------------------------------------------------------------------------------------------------------------------------------------------------------------------------------------------------------------------------------------------------------------------------------------------------------------------------------------------------------------------------------------------------------------|
| <i>Bilophila_</i><br><i>ATCC_49260</i>                                                                  | <p> MKRWAHSSLMGGVGVGLNFLREKDCCKIHEASLEVLHDRGAYFDSETAREVLRDHGCWED<br/> ADGCTHFPRTLVEALEAVPAEFVHRGRTPDDDIHMAQDQVYASNFGGEGIFTHDLETGER<br/> RSTVKQDAVDILRVVDSLNDNIHIYNRAIGPQDVPSESASMHNAEVAFCYTSKPMHLVSGS<br/> PFQTKKMIKMAEIAAGGKEELKKRPRTAFNHTTISPLRISHEACENAMIVAEAGLPNHIL<br/> VMVQQGATSPISYAGSVAVHNADFLAFNTLLQCVNRGNPTLYGASACVMDMKKGLSLVAA<br/> PEVFLNAAMARMSKYYNIPSYIAGG<b>Q</b>TDSICNDVQAGAERALNRLMTALAGASVLFQGG<br/> MLETGLTFDIPTLLVDDEIIDYVLRMLAGFKVDATTLSTDLIKEVGPFGTYLAEMNTFEH<br/> LGDSTYNLMNRRNYDMWAASGKPDLYGQARERAKEILATHKQKNPLSPEQVKAIRDVLV<br/> DAEGELGVADFWKGKEEKRFIDNDLY* </p> <p><b>(Pyl at AA 327 of 506)</b></p> |
| <i>Bilophila_</i><br><i>ATCC_49260</i>                                                                  | <p> MAQRWKKAGSLTTGGMSLNVFTQDEMDAIHRATLEVL EHTGVLIGSPEARALLVEAGASV<br/> IDEDIVRFPQWMVADAVSCAPETLLLGRTPDRDVL DSTRVMFTNFGEAVYLIDPDTGE<br/> VRNTTKKDVEKLTRVVDALDVIPVCERMAGA QDYPEQVAELHNYEALLMNTTKHVFTGGG<br/> NGKLTQYMIDMAKAAVGEENFEERCPVTFNTCPISPLKLTADVCEVIMTAARNGATVNVL<br/> SMGMAGGSTPVNLGALVVHNCEALAGLVLAQTTRRGAKFIYSSSTAMDLRYGAAVVGT<br/> PELAVLNAGVAAMARYYKLP SWAAG<b>Q</b>GDSKCGDAQSGHEKTLTGLLPMLAGANIIYGLG<br/> MLEMGMTISYSQLLMDAEMAEMMLFSMDGIVVND ETLSDVIKEVGPRSDFLAHMNTFEN<br/> MYIQSKPKLIDRLTRDRWNEAGHLDMESRALIAAKELLATWEPEPLPEEACARVRAVLNA<br/> AERDYGVPESE* </p> <p><b>(Pyl at AA 327 of 493)</b></p>                |
| <i>Methanosarcina</i><br><i>barkeri</i><br><i>ASM97002v1</i><br><br>(Archaeal<br>reference<br>sequence) | <p> MAKNNAVAGFNALNGVELNFLFTTDELKAIHYATMEVLM DPGIQVSDPEARQIFKENGCEV<br/> NEKTNVVKIPEYLVRKALQLAPSRFVLWGRDKKFNTVQECGGKVHWTFCFGTGKVKYQD<br/> GKYVTVDSVEKDIADIAKLCDWAENIDYFSLPVSARDIAGQGAQDVHETL TPLANTAKHF<br/> HHIDPVGGENVEYYRDIVKAYYGGDEEEARKKPIFSMLLCPTSPLELSVNACQVVIK GARF<br/> GIPVNVLSMAMSGGSSPVYLAGTLVTHNAEVL SGIVLAQLTVPGAKVWYGSSTTTFDLKK<br/> GTAPVGSPELGLISA AVAKLAQFYGLPSYVAGS<b>Q</b>SDAKVPDDQAGHEKTM TLLPALAGA<br/> NTIYGAGMLELGMTFSMEQLVIDNDIFSMVKKAMQ GIPVSEETLAVESIQKVGIGNFLA<br/> LKQTRQLVDYPSNPMLLDRHMFWDWAAAGSKDLATVAHEKVEDVLKNHQVTPIDADIFKD<br/> MQAIVDKADKAFRGM* </p> <p><b>(Pyl at AA 333 of 496)</b></p>     |
