# Supplementary material for: An Expanded Genetic Code Enables Trimethylamine Metabolism in Human Gut Bacteria
Source: PubMed Central journal article supplement (PMC7593587; doi:10.1128/msystems.00413-20), 2020-10-27
Supplement: mSystems.00413-20-st003.pdf [file mSystems.00413-20-st003.pdf]

| <b>TIGRFAM ID</b> | <b>GENE ID</b>                                                                        | <b>Role</b>         |
|-------------------|---------------------------------------------------------------------------------------|---------------------|
| TIGR02369         | trimeth_pyl: trimethylamine:corrinoid methyltransferase                               | Contains Pyl        |
| TIGR0427          | Rama_corrin_act: methylamine methyltransferase corrinoid protein reductive activase   | Part of TMA pathway |
| TIGR02370         | pyl_corrinoid: methyltransferase cognate corrinoid proteins, Methanosarcina family    | Part of TMA pathway |
| TIGR04395         | cutC_activ_rSAM: choline TMA-lyase-activating enzyme                                  | Pre-TMA pathway     |
| TIGR04394         | choline_CutC: choline trimethylamine-lyase                                            | Pre-TMA pathway     |
| TIGR00842         | bcct: transporter, betaine/carnitine/choline transporter (BCCT) family                | Pre-TMA pathway     |
| TIGR03912         | PylS_Nterm: pyrrolysine--tRNA ligase, N-terminal region                               | Needed for Pyl      |
| TIGR02367         | PylS_Cterm: pyrrolysine--tRNA ligase, C-terminal region                               | Needed for Pyl      |
| TIGR03910         | pyrrolys_PylB: pyrrolysine biosynthesis radical SAM protein                           | Needed for Pyl      |
| TIGR03909         | pyrrolys_PylC: pyrrolysine biosynthesis protein PylC                                  | Needed for Pyl      |
| TIGR03911         | pyrrolys_PylD: pyrrolysine biosynthesis protein PylD                                  | Needed for Pyl      |
| TIGR01918         | various_sel_PB: selenoprotein B, glycine/betaine/sarcosine/D-proline reductase family | Contains Sec        |
| TIGR01917         | gly_red_sel_B: glycine reductase, selenoprotein B                                     | Contains Sec        |
| TIGR00475         | selB: selenocysteine-specific translation elongation factor                           | Needed for Sec      |
| TIGR00474         | selA: L-seryl-tRNA(Sec) selenium transferase                                          | Needed for Sec      |
| TIGR00476         | selD: selenide, water dikinase                                                        | Needed for Sec      |
