# Supplementary material for: An Expanded Genetic Code Enables Trimethylamine Metabolism in Human Gut Bacteria
Source: PubMed Central journal article supplement (PMC7593587; doi:10.1128/msystems.00413-20), 2020-10-27
Supplement: mSystems.00413-20-st004.pdf [file mSystems.00413-20-st004.pdf]

| <b>DATA TYPE</b>                | <b>BIOPRPOEJCT</b> | <b>ACCESSION</b> | <b>NO. READS</b> |
|---------------------------------|--------------------|------------------|------------------|
| Human gut metatranscriptomics   | PRJNA354235        | SRR6038200       | 53999202         |
| Human gut metatranscriptomics   | PRJNA354235        | SRR6038205       | 10583862         |
| Human gut metatranscriptomics   | PRJNA354235        | SRR6038250       | 32555998         |
| Human gut metatranscriptomics   | PRJNA354235        | SRR6038264       | 11343188         |
| Human gut metatranscriptomics   | PRJNA354235        | SRR6038349       | 2347600          |
| Human gut metatranscriptomics   | PRJNA354235        | SRR6038429       | 26532234         |
| Human gut metatranscriptomics   | PRJNA354235        | SRR6038472       | 53814756         |
| Human gut metatranscriptomics   | PRJNA354235        | SRR6038359       | 56244250         |
| Mouse cecal metatranscriptomics | PRJNA445875        | SRR6904614       | 58278596         |
| Mouse cecal metatranscriptomics | PRJNA445875        | SRR6904615       | 62005814         |
| Mouse cecal metatranscriptomics | PRJNA445875        | SRR6904616       | 58553182         |
| Mouse cecal metatranscriptomics | PRJNA445875        | SRR6904617       | 57362426         |

| <b>HUMAN<br/>FECAL<br/>SAMPLES</b> | <b>METATRANSCRIPTOMIC<br/>AMINO ACID SEQUENCE</b>                                                                                                                                                       | <b>Bilophila<br/>3_1_6<br/>% ID</b> | <b>Bilophila<br/>_4_1_30<br/>% ID</b> | <b>Bilophila_<br/>ATCC_49260<br/>% ID</b> |
|------------------------------------|---------------------------------------------------------------------------------------------------------------------------------------------------------------------------------------------------------|-------------------------------------|---------------------------------------|-------------------------------------------|
| TMA<br>methyl-<br>transferase      | MQAGAERALNRLMTALAGASVLF<br>GQGMLETGLTFDIPTLLVDDEIIDY<br>V                                                                                                                                               | 100%                                | 100%                                  | 100%                                      |
| TMA<br>methyl-<br>transferase      | FGEGIFTHDLETGERRSTVKQDA<br>VDILRVVDSLNIHIYNRAIGPQDV<br>PSESASMHNAEVAFCYTSKPMHL<br>VSGSPFQTKKMIKMAEIAAGGKE<br>ELKRRPRTAFNHTTISPLRISHEA<br>CENAMIVAEAGLPNHILVMVQQG<br>ATSPISYAGSVAVHNADFLAFNTL<br>MQCVNRG | 100%                                | 100%                                  | 100%                                      |
| PyIC                               | EAELRAYIPEGFDAEGWVLESYC<br>PGPSFSLEICGTPGNYRIFQVTDL<br>LMDEAFD                                                                                                                                          | 98%                                 | 100%                                  | 100%                                      |
| Pyl<br>synthetase<br>N-term        | WRMTDEDSAVYGETSDFVDKNG<br>MELASSALGPHPLDAAWGIMEN<br>WVGIGF                                                                                                                                              | 100%                                | 100%                                  | 100%                                      |
| PyID                               | AGHLGFEADVLPADVPGFQLAKS<br>GGFDLFIWADDDTYLAENILGTGTV<br>GENGRATGRGFATALIRMAARKR<br>LDKRALVLGAGPVGCAGAETLAL<br>AGYE                                                                                      | 100%                                | 100%                                  | 100%                                      |

| <b>MOUSE<br/>CECAL<br/>SAMPLES</b> | <b>METATRANSCRIPTOMIC<br/>AMINO ACID SEQUENCE</b>                                                                                                                                                                                                                                                                                                         | <b>Bilophila<br/>3_1_6<br/>% ID</b> | <b>Bilophila<br/>_4_1_30<br/>% ID</b> | <b>Bilophila_<br/>ATCC_49260<br/>% ID</b> |
|------------------------------------|-----------------------------------------------------------------------------------------------------------------------------------------------------------------------------------------------------------------------------------------------------------------------------------------------------------------------------------------------------------|-------------------------------------|---------------------------------------|-------------------------------------------|
| TMA<br>methyl-<br>transferase      | YVGEENFEERCPVTFNTCPISPLK<br>LTADVCEVIMTAARNGATVNVLS<br>MGMAGGSTPVNLAGALVVHNCE<br>ALAGLVLAQTTRRGAKFIYGSST<br>AMDRLYGAAVVGTPELAVLNAGV<br>AAMARYYKLPSSWAAGGOGDSKC<br>GDAQSGHEKTLTGLLPMLAGANII<br>YGLGMLEMGMTISYSQLLMDAEM<br>AEMMLFSMDGIVVNDETLSVDVIK<br>EVGPSDFLAHMNTFENMYIQSKP<br>KLIDRLTRDRWNEAGHLDMESRA<br>LIAAKELLATWEPEPLPEEACARV<br>RAVLNAAERDYGVPESLE | 100%                                | 100%                                  | 99%                                       |
| TMA<br>methyl-<br>transferase      | QCVNRGNPTLYGASACVMDMKK<br>GLSLVAPEVFVLNAAMARMSKY<br>YNIPSYIAGGOTDSICNDVQAGAE<br>RALNRLMTALAGASVLFQGMLE<br>TGLTFDIPTLLVDDEIIDYVLRMLA<br>GFKVDATTLSTDLIKEVGPFGTYL<br>AEMNTFEHLG                                                                                                                                                                             | 99%                                 | 99%                                   | 99%                                       |
| Pyl<br>synthetase<br>C-term        | AGIEGWRMTDEDSAVYGETSDFV<br>DKNGMELASSALGPHPLDAAWGI<br>MENWVGIGFGLERLTMAATGEST<br>MAKTGRSLSYLHGIRLRI                                                                                                                                                                                                                                                       | 100%                                | 99%                                   | 100%                                      |
| PyIB                               | WYACYQETHNRDLFTRLRLEQDY<br>DRRKRTRLEAAGCGLLAEDGLLT<br>GVGESAEDLADSILDMAREPLDQ<br>VRAMSYVPHESTFPSTAGDTLEE<br>RRAHELLAIAAMRLVMEDRLIPAS<br>LDVDGLEGLAMRLKAGANVVTSI<br>VPSGCGLAGVASKDLDIENQRRS<br>VAAVVRQLGVGLPEPALPGEYRA<br>WVEQRRRGEER                                                                                                                      | 99%                                 | 99%                                   | 99%                                       |

| <b>MOUSE<br/>CECAL<br/>SAMPLES</b> | <b>METATRANSCRIPTOMIC<br/>AMINO ACID SEQUENCE</b>                                                                                               | <b>Bilophila<br/>3_1_6<br/>% ID</b> | <b>Bilophila<br/>_4_1_30<br/>% ID</b> | <b>Bilophila_<br/>ATCC_49260<br/>% ID</b> |
|------------------------------------|-------------------------------------------------------------------------------------------------------------------------------------------------|-------------------------------------|---------------------------------------|-------------------------------------------|
| PyIC                               | GDRKFLEGGGRMRVTIVGGGLQ<br>GVELCWLARKAGWGTLVDERP<br>APPALRLADVFAQCDVTKLGGSG<br>VLTR                                                              | 100%                                | 98%                                   | 100%                                      |
| PyIC                               | REMEAALLNLAEMLRHLGLMDLE<br>VIQAPEGMRVLEIDARFPSQTPTA<br>VWLSTGVNLAEHLAACFFPYAPG<br>SGLGAPRFARYEHLVCKDGGLHF<br>LGEHIMGQFGPLEPVNGFCGADE<br>ALVGGSL | 99%                                 | 98%                                   | 100%                                      |
| PyID                               | GENGRATGRGFATALIRMAARKR<br>LDKRALVLGAGPVCAGAETLAL<br>AGYEVFLCDMDGEKARAACGAL<br>SGCTPCTPDDL SGLPLFECLLDA<br>APTNDFFP                             | 99%                                 | 98%                                   | 100%                                      |
| PyI<br>synthetase<br>N-term        | PLPNLPLPLPTSSFPSTLKSEIAMS<br>ETPTTRPAPKQRTYRKNQFLFALI<br>GKMKLWPSRKGILHGIRTMEIAG<br>DH                                                          | 100%                                | 100%                                  | 100%                                      |
