# Supplementary material for: An Expanded Genetic Code Enables Trimethylamine Metabolism in Human Gut Bacteria
Source: PubMed Central journal article supplement (PMC7593587; doi:10.1128/msystems.00413-20), 2020-10-27
Supplement: mSystems.00413-20-st005.pdf [file mSystems.00413-20-st005.pdf]

|                                    |                                                                                                                                                                                                                                                                                                                                                     | %<br>IDENTITY<br>with:     | %<br>IDENTITY<br>with:      | %<br>IDENTITY<br>with:                |
|------------------------------------|-----------------------------------------------------------------------------------------------------------------------------------------------------------------------------------------------------------------------------------------------------------------------------------------------------------------------------------------------------|----------------------------|-----------------------------|---------------------------------------|
| <b>PROTEIN ID,<br/>Human fecal</b> | PROTEIN SEQUENCE                                                                                                                                                                                                                                                                                                                                    | <b>Bilophila<br/>3_1_6</b> | <b>Bilophila<br/>4_1_30</b> | <b>Bilophila<br/>_ATCC_<br/>49260</b> |
| TMA<br>methyltransferase           | MQAGAERALNRLMTALAGASVLFQG<br>GMLETGLTFDIPTLLVDDEIIDYV                                                                                                                                                                                                                                                                                               | 100%                       | 100%                        | 100%                                  |
| TMA<br>methyltransferase           | FGEGIFTHDLETGERRSTVKQDAVDILR<br>VVDSLNDNIHIYNRAIGPQDVPSESASM<br>HNAEVAFICYTSKPMHLVSGSPFQTKK<br>MIKMAEIAAGGKEELKRRPRTAFNHTTI<br>SPLRISHEACENAMIVAEAGLPNHILVM<br>VQQGATSPISYAGSVAVHNADFLAFNT<br>LMQCVNRG                                                                                                                                              | 100%                       | 100%                        | 100%                                  |
| Pyl biosynthesis<br>protein PylC   | EaelRAYIPEGFDAEGWVLESYCPGPSF<br>SLEICGTPGNyRIFQVTDLLMDEAFD                                                                                                                                                                                                                                                                                          | 98%                        | 100%                        | 100%                                  |
| Pyl tRNA<br>synthetase N-term      | WRMTDEDSAVYGETSDFVDKNGMEL<br>ASSALGPHPLDAAWGIMENWVGIGF                                                                                                                                                                                                                                                                                              | 100%                       | 100%                        | 100%                                  |
| Pyl biosynthesis<br>protein PylD   | AGHLGFEADVLPADVPGFQLAKSGGF<br>DLFIWADDDTYLAENILGTGTVGENGRA<br>TGRGFATALIRMAARKRLDKRALVPGA<br>GPVGCAGAETLALAGYE                                                                                                                                                                                                                                      | 100%                       | 100%                        | 100%                                  |
| <b>PROTEIN ID,<br/>Mouse cecal</b> |                                                                                                                                                                                                                                                                                                                                                     |                            |                             |                                       |
| TMA<br>methyltransferase           | YVGEENFEERCPVTFNTCPISPLKLTAD<br>VCEVIMTAARNGATVNVLSMGMAGG<br>STPVNLAGALVVHNCEALAGLVLAQTT<br>RRGAKFIYGSSTAMDLYGAAVVGTP<br>ELAVLNAGVAAMARYYKLPSWAAGG<br>OGDSKCGDAQSGHEKTLTGLLPMLAG<br>ANIIYGLGMLEMGMTISYSQLLMDAE<br>MAEMMLFSMDGIVVNDETLSVDVIKE<br>VGPSDFLAHMNTFENMYIQSKPKLIDR<br>LTRDRWNEAGHLDMESRALIAAKELLA<br>TWEPEPLPEEACARVRAVLNAAERDYG<br>VPESLE | 100%                       | 100%                        | 99%                                   |
| TMA<br>methyltransferase           | QCVNRGNPTLYGASACVMDMKKGLSL<br>VAAPEVFLNAAMARMSKYYNIPSYIA<br>GGOTDSICNDVQAGAERALNRLMTAL<br>AGASVLFQGGMLETGLTFDIPTLLVDD<br>EIIDYVLRMLAGFKVDATTLSTDLIKEVG<br>PFGTYLAEMNTFEHLG                                                                                                                                                                          | 99%                        | 99%                         | 99%                                   |

|                               |                                                                                                                                                                                                                                  |      |      |      |
|-------------------------------|----------------------------------------------------------------------------------------------------------------------------------------------------------------------------------------------------------------------------------|------|------|------|
| Pyl tRNA synthetase C-term    | AGIEGWRMTDEDSAVYGETSDFVDKN<br>GMELASSALGPHPLDAAWGIMENWV<br>GIGFGLERLTMAATGESTMAKTGRSLS<br>YLHGIRLRI                                                                                                                              | 100% | 99%  | 100% |
| Pyl biosynthesis protein PylB | WYACYQETHNRDLFTRLRLEQDYDRRK<br>RTRLEAAGCGLLAEDGLLTGVGESAEDL<br>ADSILDMAREPLDQVRAMSYVPHESTF<br>PSTAGDTLEERRAHELLAIAAMRLVME<br>DRLIPASLDVDGLEGLAMRLKAGANVV<br>TSIVPSGCGLAGVASKDLDIENQRRSVA<br>AVVRQLGVLGLEPALPGEYRAWVEQR<br>RRGEER | 99%  | 99%  | 99%  |
| Pyl biosynthesis protein PylC | GDRKFLEGGGRMRVTIVGGGLQGVEL<br>CWLARKAGWGTLVDERPAPPALRLA<br>DVFAQCDVTKLGGSGVLTR                                                                                                                                                   | 100% | 98%  | 100% |
| Pyl biosynthesis protein PylC | REMEAALLNLAEMLRHLMDLEVIQ<br>APEGMRVLEIDARFPSQTPTAVWLSTG<br>VNLAEHLAACFFPYAPGSGLGAPRFAR<br>YEHVLCKDGGLHFLGEHIMGQFGPLEP<br>VNGFCGADEALVGGSSL                                                                                       | 99%  | 98%  | 100% |
| Pyl biosynthesis protein PylD | GENGRATGRGFATALIRMAARKRLDKR<br>ALVLGAGPVGCAGAETLALAGYEVFLC<br>DMDGEKARAACGALSGCTPCTPDDL<br>GLPLFECLLDAAPTNDFFP                                                                                                                   | 99%  | 98%  | 100% |
| Pyl tRNA synthetase N-term    | PLPNLPLPLPTSSFPSTLKSEIAMSETPTT<br>RPAPKQRTYRKNQFLFALIGKMKLWPS<br>RKGILHGIRTMEIAGDH                                                                                                                                               | 100% | 100% | 100% |
